# Supplementary material
Source: publisher figshare collection journal article supplement (https://tandf.figshare.com/ndownloader/files/17544632)
Supplement: Supplementary file 1 [file 17544632]

Supplementary table 1: Details of primers used in this study.

| Gene Name | Forward Primers | Reverse Primers |
| --- | --- | --- |
| actin | 5’-GATCTTGCTGGTCGTGATT-3’ | 5’-TCCTGGCAGTTTCAATCTCC-3’ |
| psbA | 5’-TGGATGGTTTGGTGTTTTGATG-3’ | 5’-CCGTAAAGTAGA GACCCTGAAAC-3’ |
| Chlase | 5′-GCAAACTCCGCCATCAGTTC-3’ | 5′-TGCCTCGAATCCCTTTGGTC-3′ |
| PBGD | 5’-TTCTCCACCGCTATCCCTCA-3’ | 5’-ATACCAATGGCACCCTGAGC-3’ |
| TRX-f | 5’-CACAGTGGTGTGGTCCTTGT-3’ | 5’-TTTGCTAGTGGCCTGTTGTC-3’ |
| TRX-m2 | 5’-GTCGATCCTCGGCAGTTAAT-3’ | 5’-TTTCCTGAGCTTCACAGACG-3’ |
| TRX-m1/4 | 5’-CCGTCGTTGTCTCCTGTTT- 3’ | 5’-GCCTCACAGACGATTCTTCC- 3’ |
| SOS1 | 5’-GAAATTTGATGACAGCTCCCC-3’ | 5’-GGTGGACTTCTAAGCGCTAC-3’ |
| APX1 | 5’-GGTCTTGACATTGCTCTCA-3’ | 5’-CTGGTGGCTCTGGCTTGTCC-3’ |
| LeRBOH1 | 5’-GTCAGGCTTCTACAGAAAAC-3’ | 5’-GTTGATTACAGTAGCCGGTTC-3’ |
